# Supplementary material for: Increasing Sustainability Literacy for Environmental Design Students: A Transdisciplinary Learning Practice
Source: MDPI journal article supplement (doi:10.3390/su141912379), 2022-09-29
Supplement: s1 [file s1]

Archive with 1 entries (1 files):
- sustainability-1891048-supplementary.pdf
