# Supplementary material for: Increasing Sustainability Literacy for Environmental Design Students: A Transdisciplinary Learning Practice
Source: MDPI journal article supplement (doi:10.3390/su141912379), 2022-09-29
Supplement: s1 [file s1 › sustainability-1891048-supplementary.pdf]

## **Text S1: The English version of the questionnaire**

### **The course evaluation of Environmental Engineering and Technology**

The questionnaire was carried out for the summary and improvement of this course. The relevant data will be used for the analysis and improvement of the course, the writing and publication of the paper. If you agree, please fill out the following questionnaire. For the first 9 questions, please choose the option that agrees with your own opinion. Thanks!

1. I enjoy the course.

( ) definitely agree

( ) tend to agree

( ) doesn't apply or unsure

( ) tend to disagree

( ) definitely disagree

2. I think this course has increased my literacy of sustainable design.

( ) definitely agree

( ) tend to agree

( ) doesn't apply or unsure

( ) tend to disagree

( ) definitely disagree

3. I think the ideas of sustainability is important to me as a designer.

( ) definitely agree

( ) tend to agree

( ) doesn't apply or unsure

( ) tend to disagree

( ) definitely disagree

4. I will add sustainability to my future design work.

( ) definitely agree

( ) tend to agree

( ) doesn't apply or unsure

- ( ) tend to disagree
- ( ) definitely disagree
5. This course helps me better cooperate and communicate with others.
- ( ) definitely agree
- ( ) tend to agree
- ( ) doesn't apply or unsure
- ( ) tend to disagree
- ( ) definitely disagree
6. This course has developed my skills in interdisciplinary learning.
- ( ) definitely agree
- ( ) tend to agree
- ( ) doesn't apply or unsure
- ( ) tend to disagree
- ( ) definitely disagree
7. I can understand the engineering concepts and methods involved in this course, such as sponge city construction.
- ( ) definitely agree
- ( ) tend to agree
- ( ) doesn't apply or unsure
- ( ) tend to disagree
- ( ) definitely disagree
8. I think the teaching method used in this course is reasonable.
- ( ) definitely agree
- ( ) tend to agree
- ( ) doesn't apply or unsure
- ( ) tend to disagree
- ( ) definitely disagree
9. I think the design practice is challenging.
- ( ) definitely agree
- ( ) tend to agree

(    ) doesn't apply or unsure

(    ) tend to disagree

(    ) definitely disagree

10. Which part of the course do you like best?

---

---

---

11. What are the difficulties encountered in this course?

---

---

---

12. What are your comments and suggestions about this course?

---

---

---
